# Supplementary material for: D- and N-Methyl Amino Acids for Modulating the Therapeutic Properties of Antimicrobial Peptides and Lipopeptides
Source: MDPI journal article supplement (doi:10.3390/antibiotics12050821), 2023-04-27
Supplement: s1 [file s1]

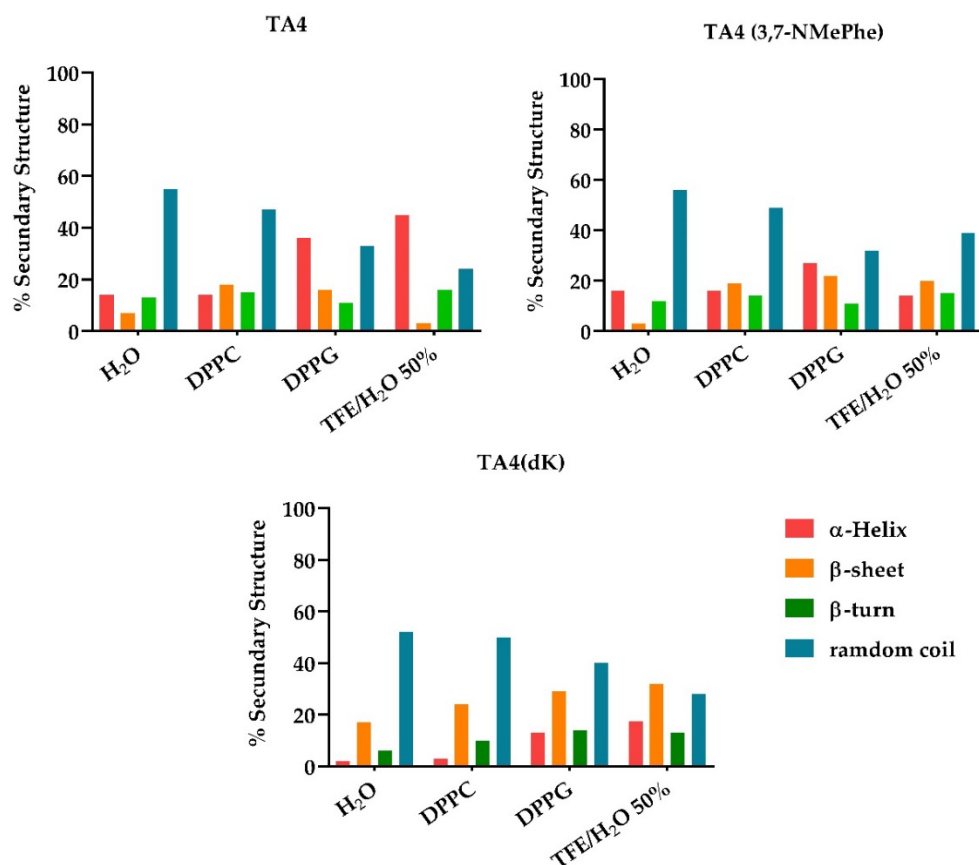

**Figure 1S.** Percentage of secondary structure types of peptides obtained by deconvolution of spectra by means of CDPro software package (Colorado State University), using SELCOM 3 and CONTILL methods.

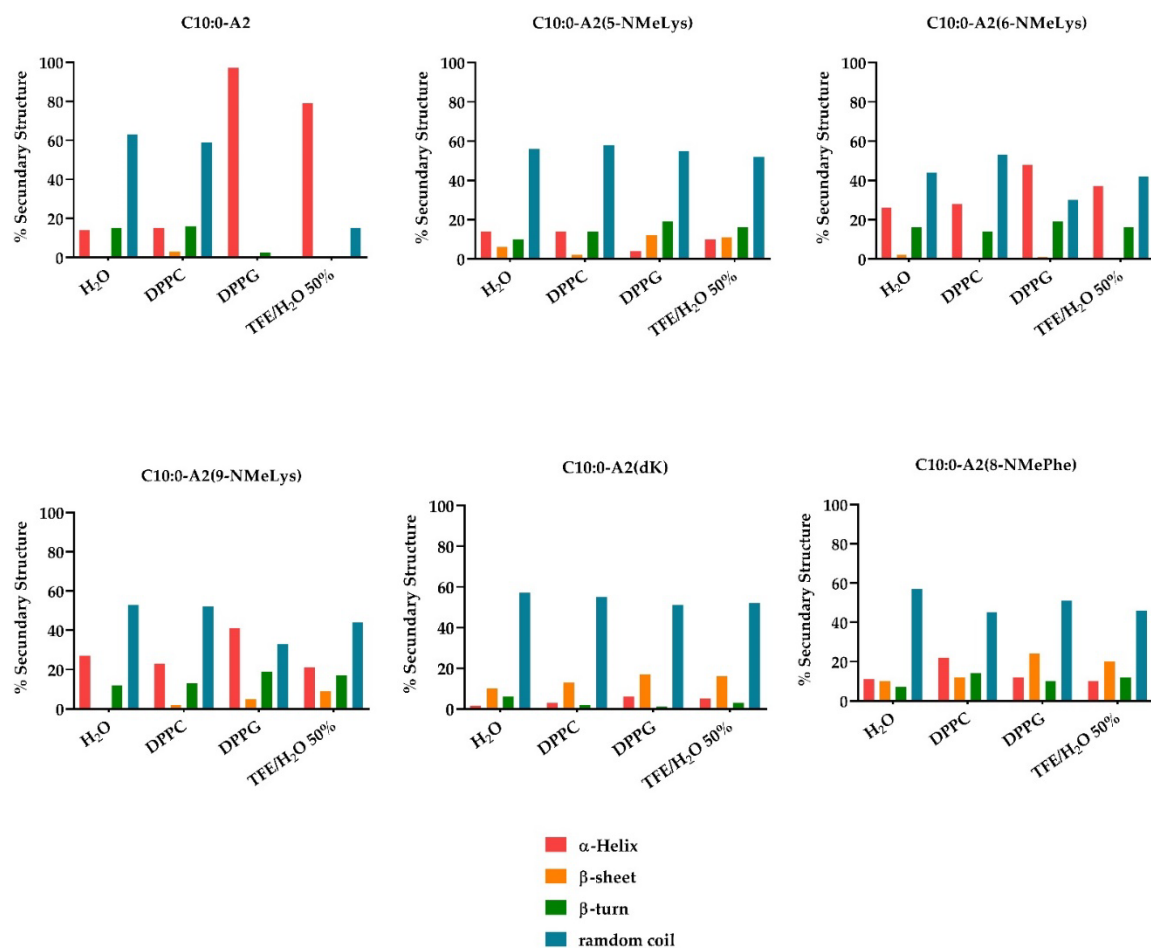

**Figure 2S. Percentage of secondary structure types lipopeptides obtained by deconvolution of spectra by means of CDPro software package (Colorado State University), using SELCOM 3 and CONTILL methods**
